# Supplementary material for: Troponin and Other Biomarker Levels and Outcomes Among Patients Hospitalized With COVID‐19: Derivation and Validation of the HA2T2 COVID‐19 Mortality Risk Score
Source: PubMed Central journal article supplement — J Am Heart Assoc. 2021 Feb 26;10(6):e018477. doi: 10.1161/JAHA.120.018477 (PMC8174190; doi:10.1161/jaha.120.018477), 2021-02-26
Supplement: JAH3-10-e018477-s001.pdf [file JAH3-10-e018477-s001.pdf]

# **SUPPLEMENTAL MATERIAL**

Figure S1. Flowchart of study population.

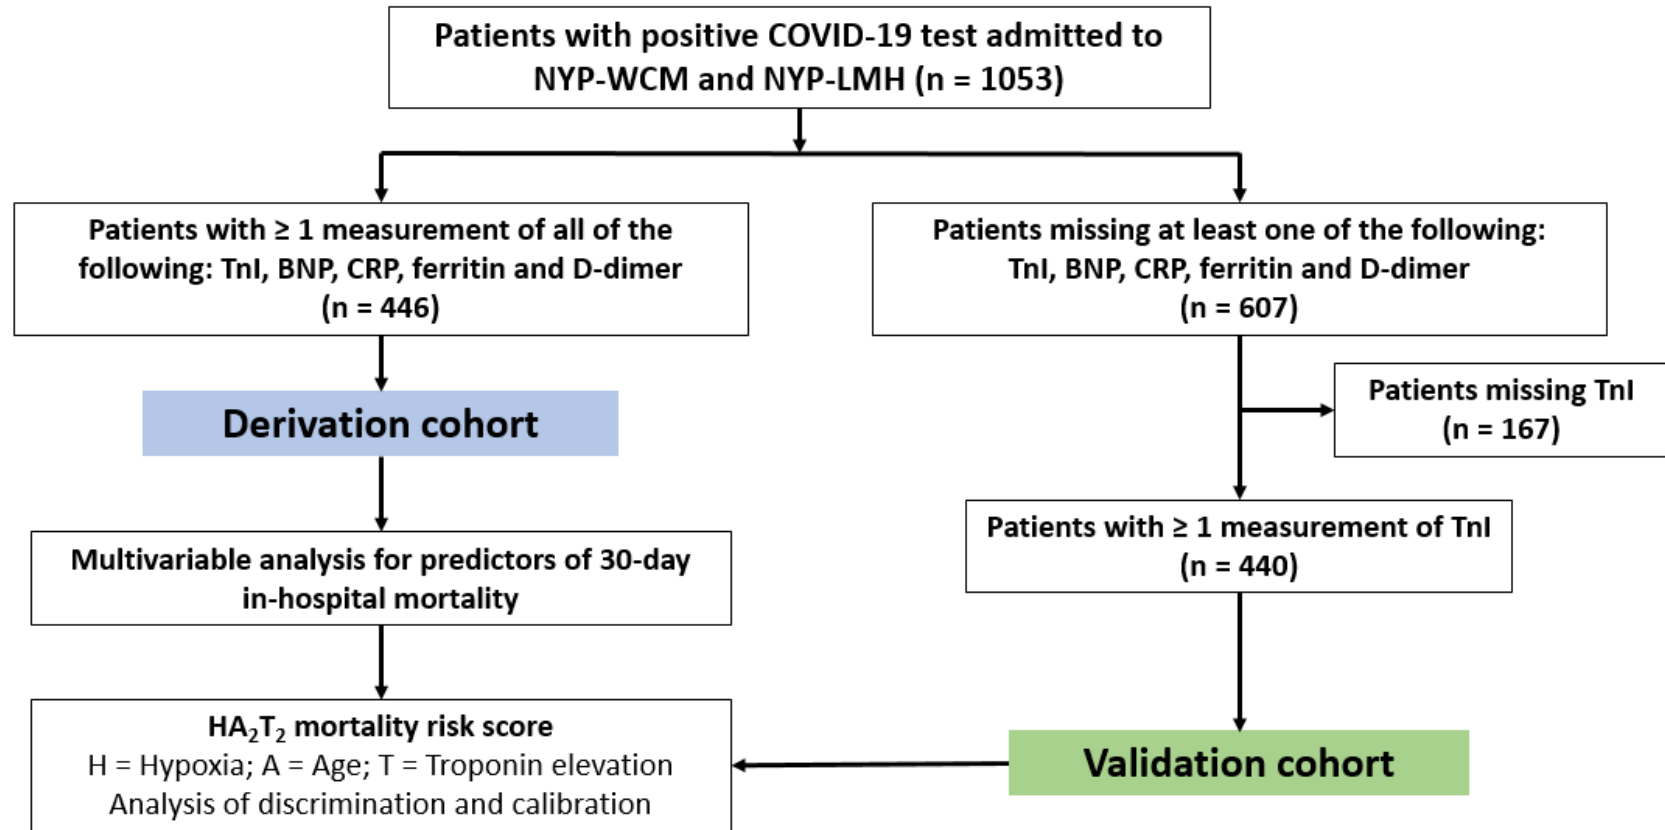

BNP = B-type natriuretic peptide; CRP = C-reactive protein; NYP-LMH = New York Presbyterian Hospital – Lower Manhattan Hospital; NYP-WCM = New York Presbyterian Hospital – Weill Cornell Medicine; TnI = troponin-I
